# Supplementary material for: Performance and Stability Analysis of Selected Durum Wheat Genotypes Differing in Their Kernel Characteristics
Source: MDPI journal article supplement (doi:10.3390/plants12142664), 2023-07-16
Supplement: s1 [file s1]

Table S2. Combined analysis of variance (ANOVA), grand mean values, broad-sense heritability ( $H^2$ ) and the coefficient of variation (CV) for nine traits collected from eight durum wheat genotypes tested across 15 different environments.

| Statistic                               | TW        | GY       | HI       | TKW      | KA       | KW       | KL       | KC       | KLKW     |
|-----------------------------------------|-----------|----------|----------|----------|----------|----------|----------|----------|----------|
| <b>Genotype Variance</b>                | 1042.160  | 1825.018 | 11.175   | 27.383   | 5.441    | 0.005    | 0.811    | 0.012    | 0.062    |
| <b>GenxLoc Variance</b>                 | 24779.354 | 4491.951 | 16.424   | 15.880   | 1.157    | 0.010    | 0.061    | 0.001    | 0.007    |
| <b>Residual Variance</b>                | 10731.418 | 1462.309 | 7.615    | 3.900    | 0.473    | 0.005    | 0.072    | 0.003    | 0.012    |
| <b>Genotype Significance</b>            | 0.3973    | 9.11E-06 | 1.10E-08 | 1.27E-18 | 6.27E-33 | 3.59E-06 | 3.95E-48 | 1.38E-30 | 6.44E-39 |
| <b>GenxEnv Significance</b>             | 1.14E-36  | 7.75E-45 | 1.04E-34 | 3.56E-58 | 1.68E-40 | 4.04E-34 | 1.70E-15 | 0.00182  | 1.01E-09 |
|                                         |           |          |          |          |          |          |          |          |          |
| <b>Percentage of Variation-Genotype</b> | 2.851     | 23.460   | 31.73467 | 58.014   | 76.897   | 23.591   | 85.923   | 76.283   | 76.914   |
| <b>Percentage of Variation-GenxEnv</b>  | 67.790    | 57.74253 | 46.640   | 33.597   | 16.313   | 51.158   | 6.474    | 7.078    | 8.267    |
| <b>Percentage of Variation-Residual</b> | 29.359    | 18.798   | 21.626   | 8.389    | 6.790    | 25.251   | 7.603    | 16.639   | 14.819   |
|                                         |           |          |          |          |          |          |          |          |          |
| <b>Grand Mean</b>                       | 1078.929  | 336.274  | 29.462   | 38.316   | 17.502   | 3.038    | 7.741    | 1.629    | 2.580    |
|                                         |           |          |          |          |          |          |          |          |          |
| <b>Heritability (H2)</b>                | 0.355     | 0.846    | 0.898    | 0.960    | 0.984    | 0.856    | 0.993    | 0.986    | 0.989    |
|                                         |           |          |          |          |          |          |          |          |          |
| <b>CV (%)</b>                           | 9.601     | 11.372   | 9.367    | 5.154    | 3.930    | 2.310    | 3.455    | 3.528    | 4.226    |
