# Supplementary material for: Performance and Stability Analysis of Selected Durum Wheat Genotypes Differing in Their Kernel Characteristics
Source: MDPI journal article supplement (doi:10.3390/plants12142664), 2023-07-16
Supplement: s1 [file s1]

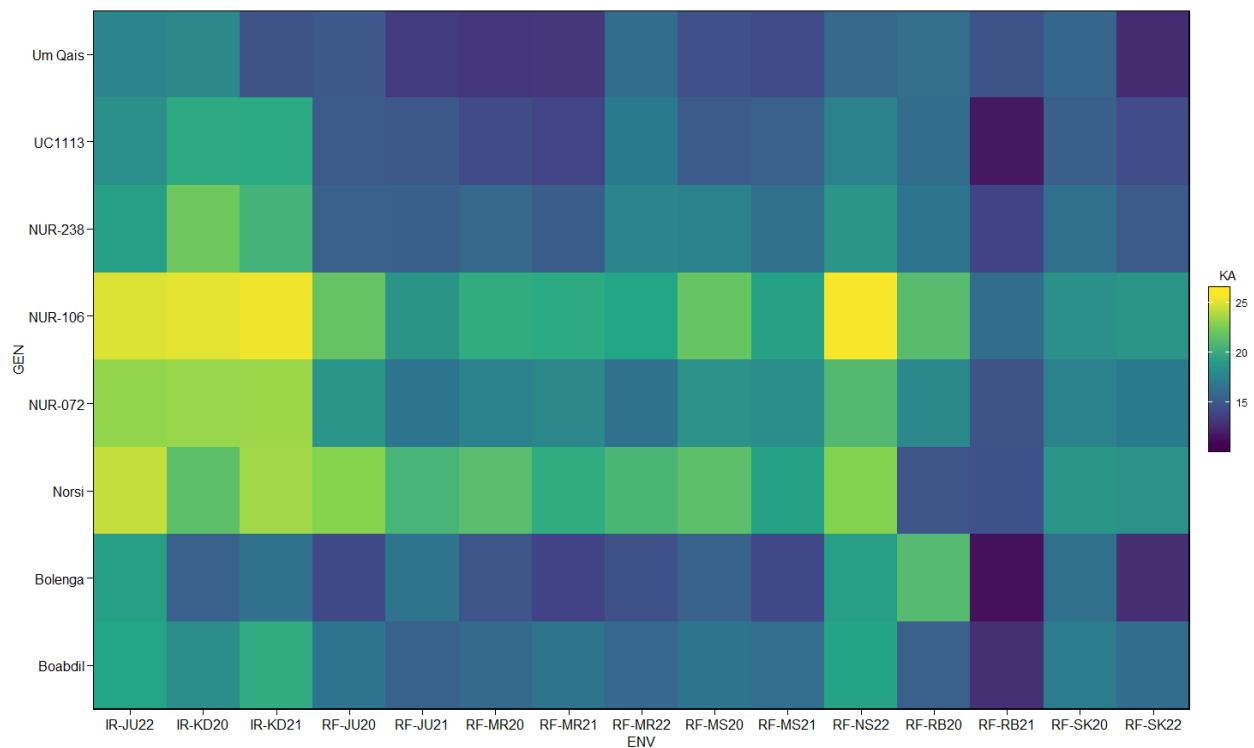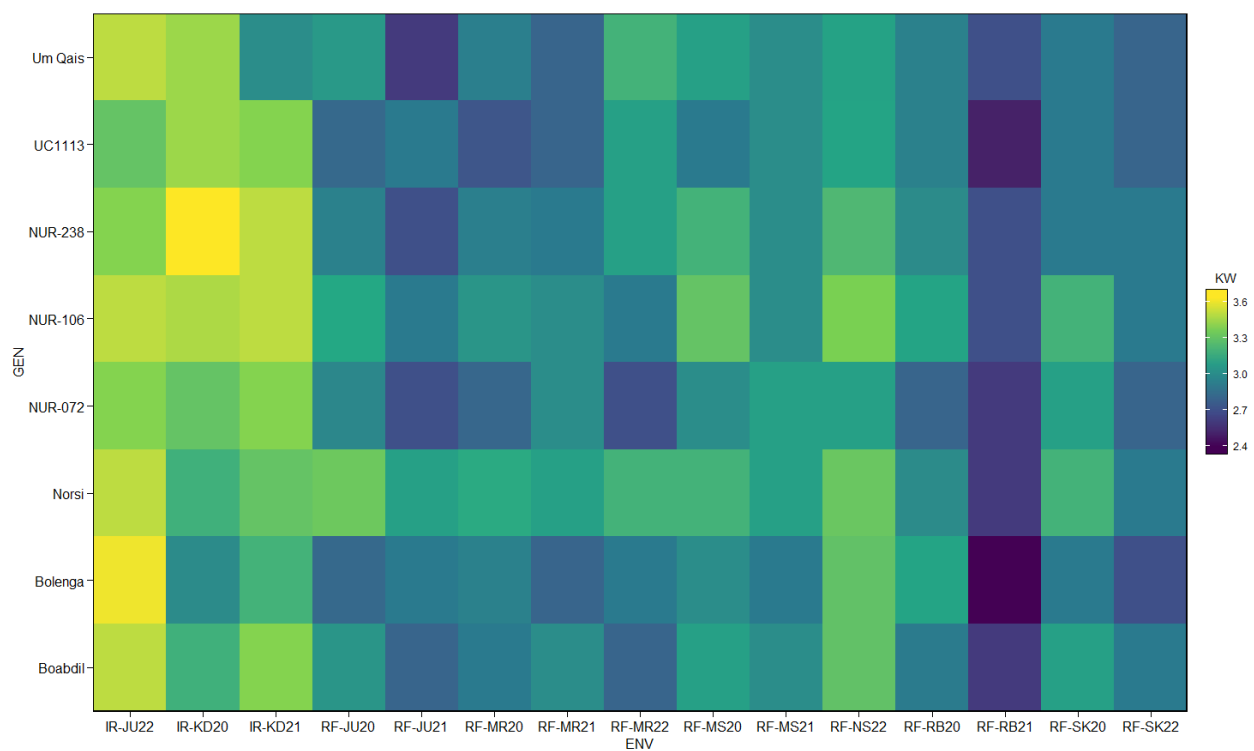



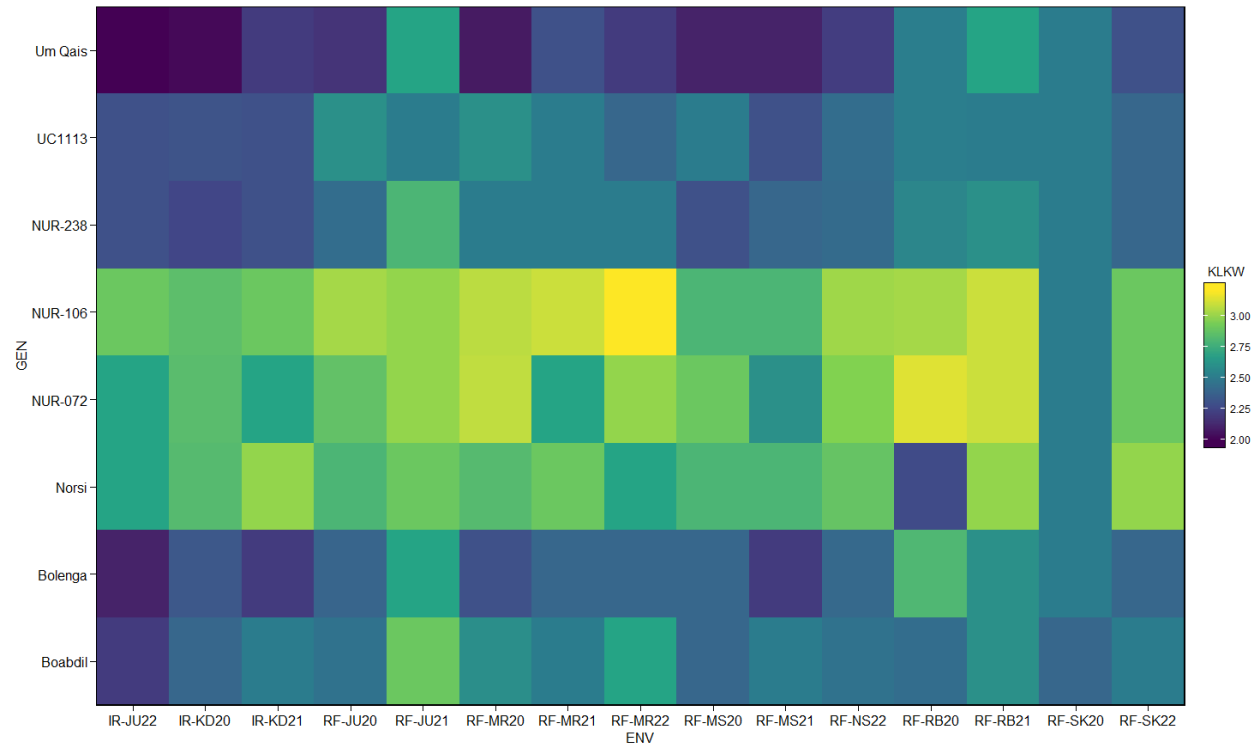

**Figure S1.** Heatmaps for kernel-related traits (KA, KW, KL, KC and KL:KW) performance in eight durum wheat genotypes across 15 tested environments.

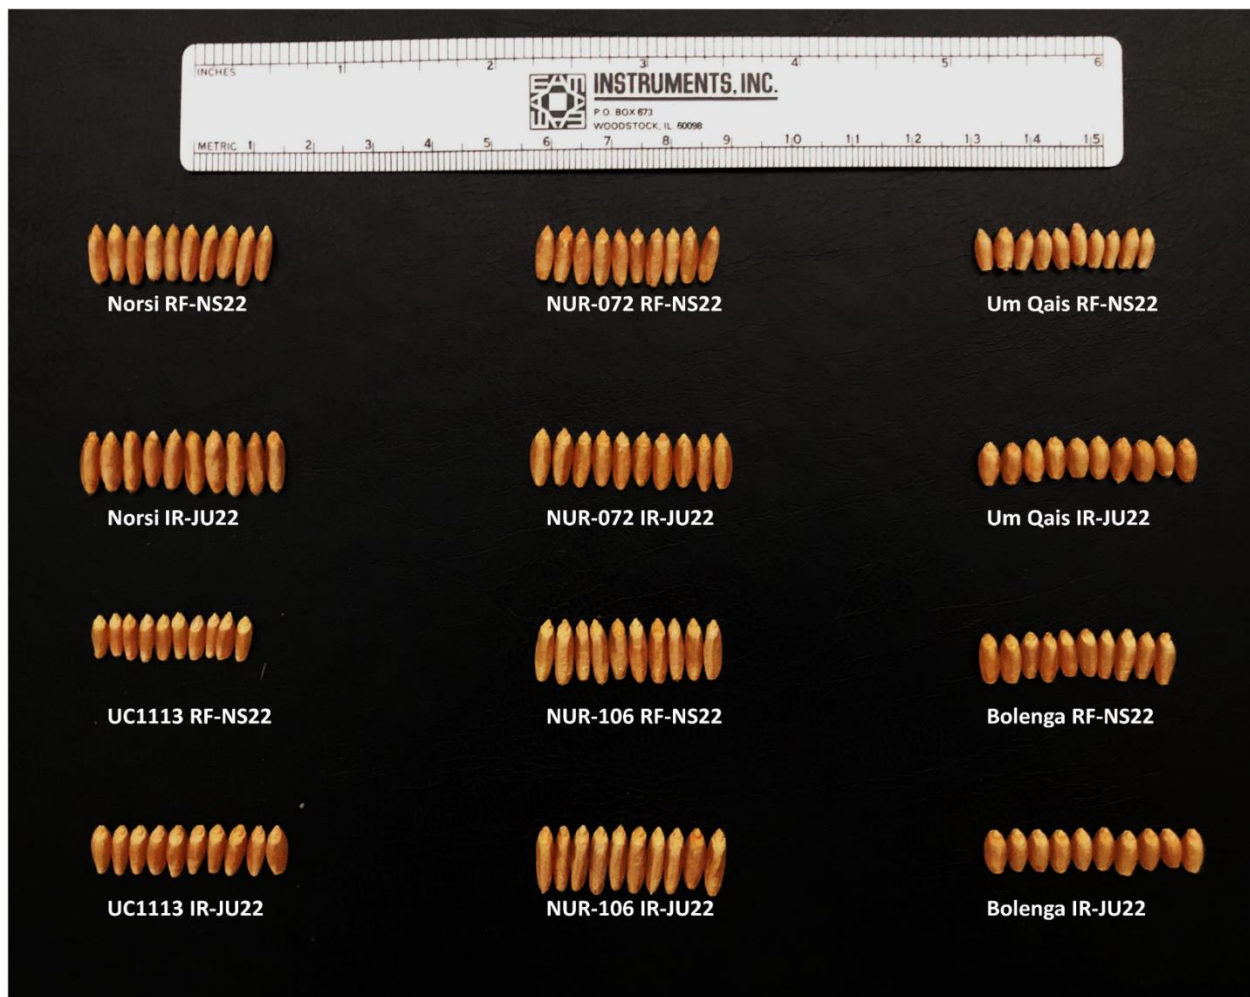

**Figure S2.** Kernels of six selected durum wheat genotypes (Norsi, UC1113, NUR-072, NUR-106, Um Qais and Bolenga) grown under supplementary irrigated (IR-JU22) or rainfed (RF-NS22) conditions.

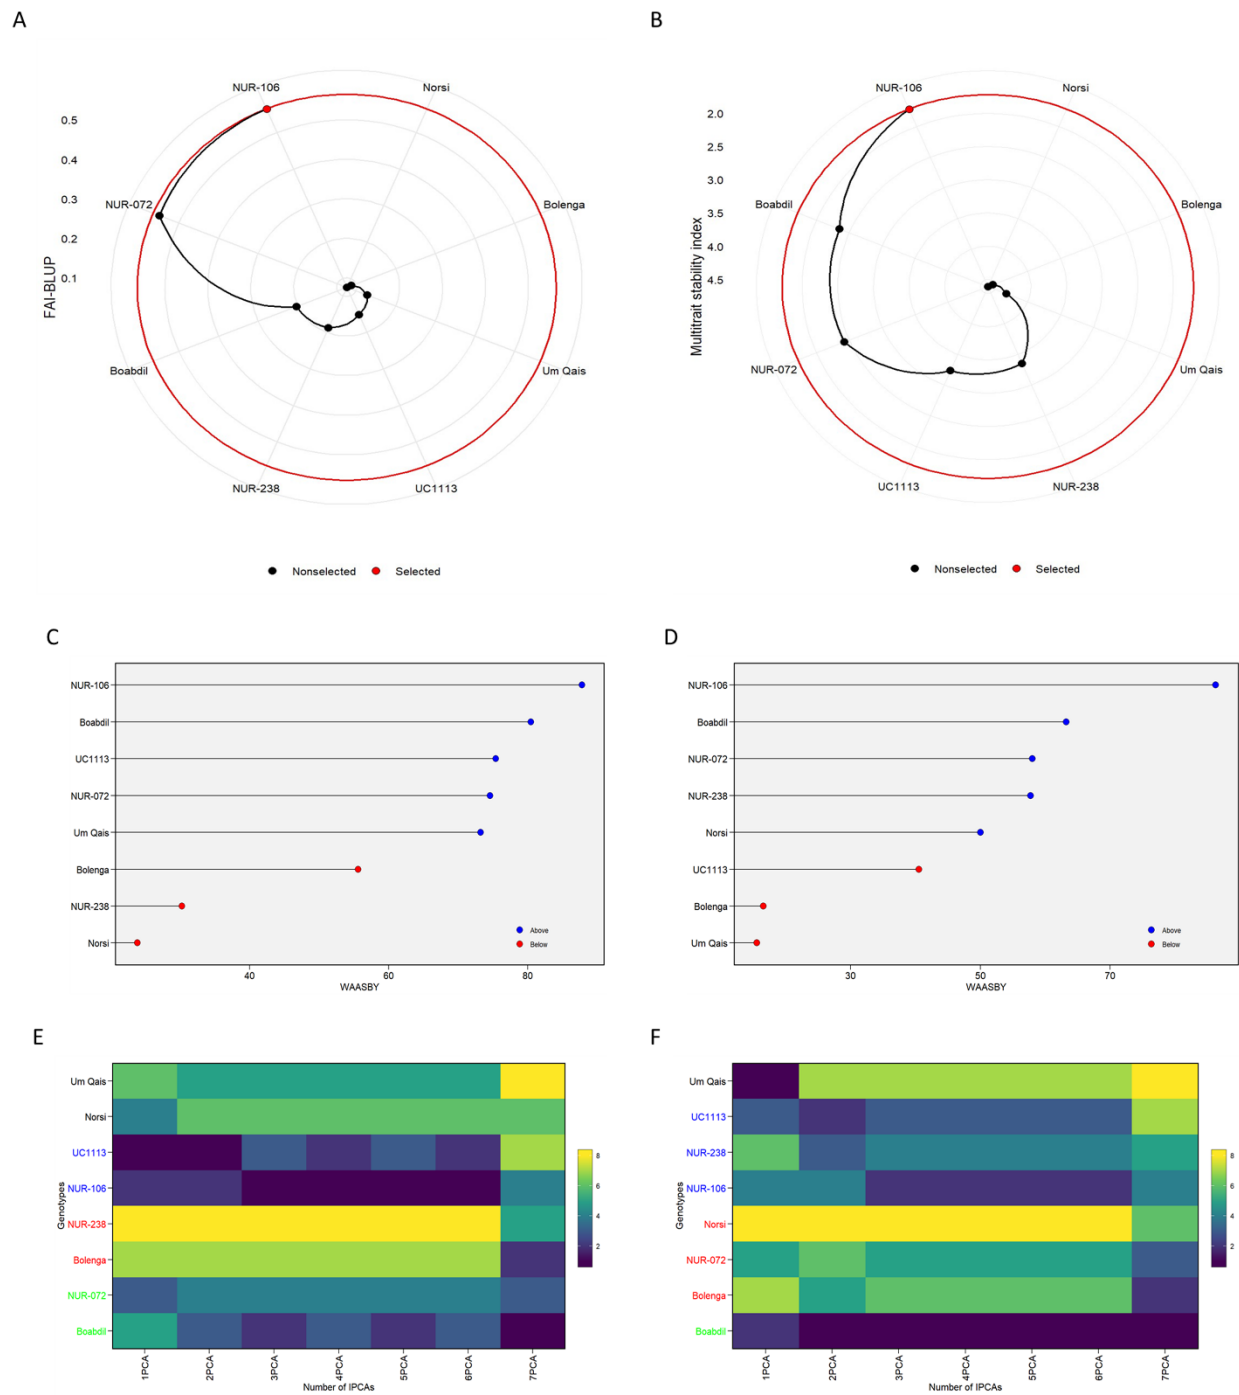

**Figure S3.** FAI-BLUP (A), MTSI (B), WAASBY (C) and WAASB (D) indices for eight durum wheat genotypes tested across 15 environments.

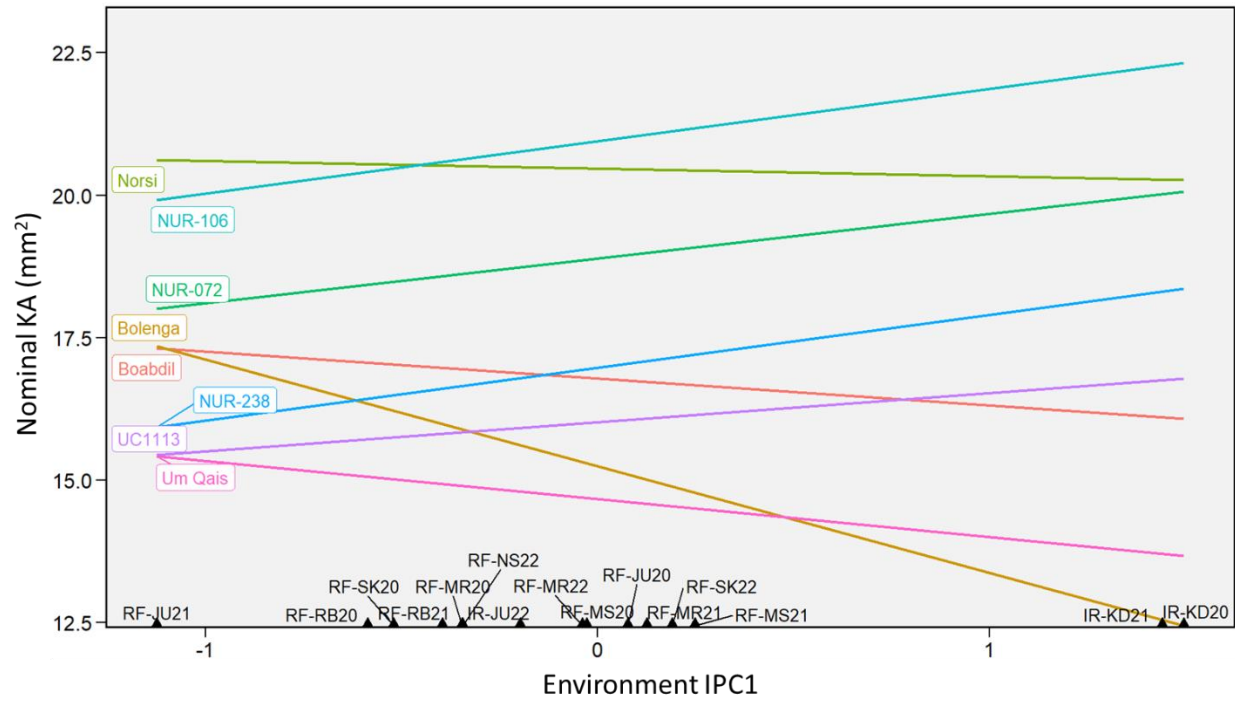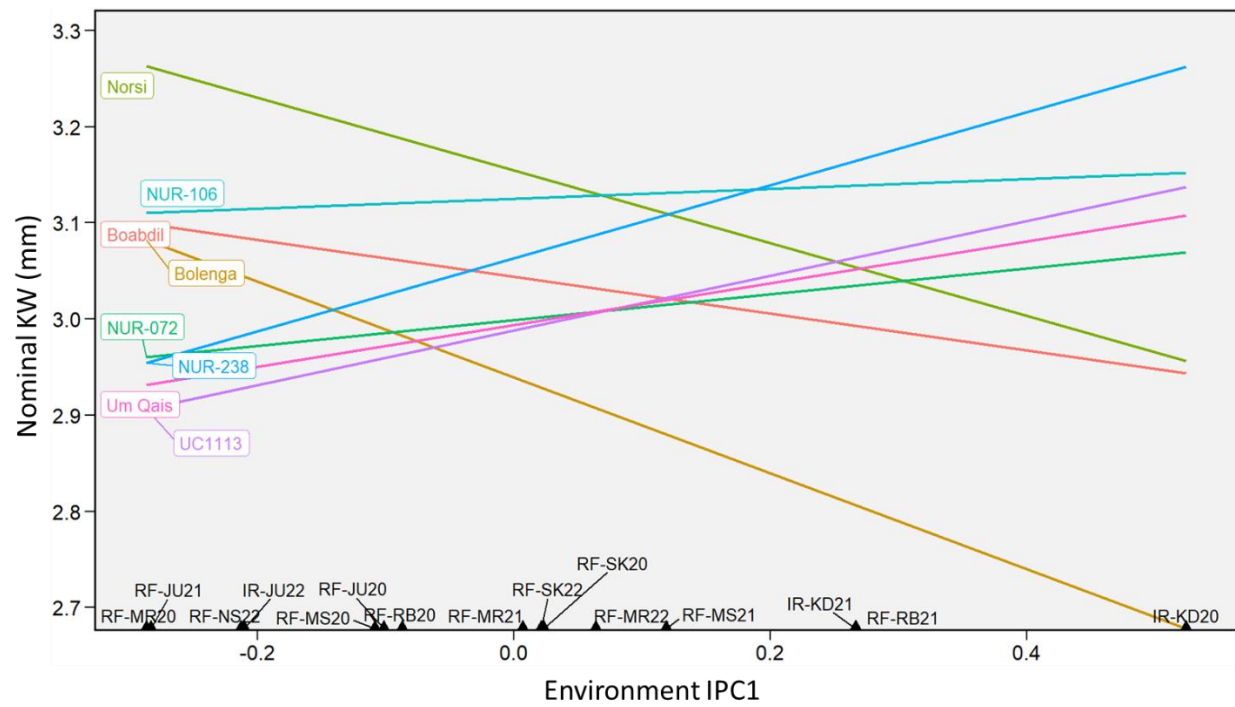

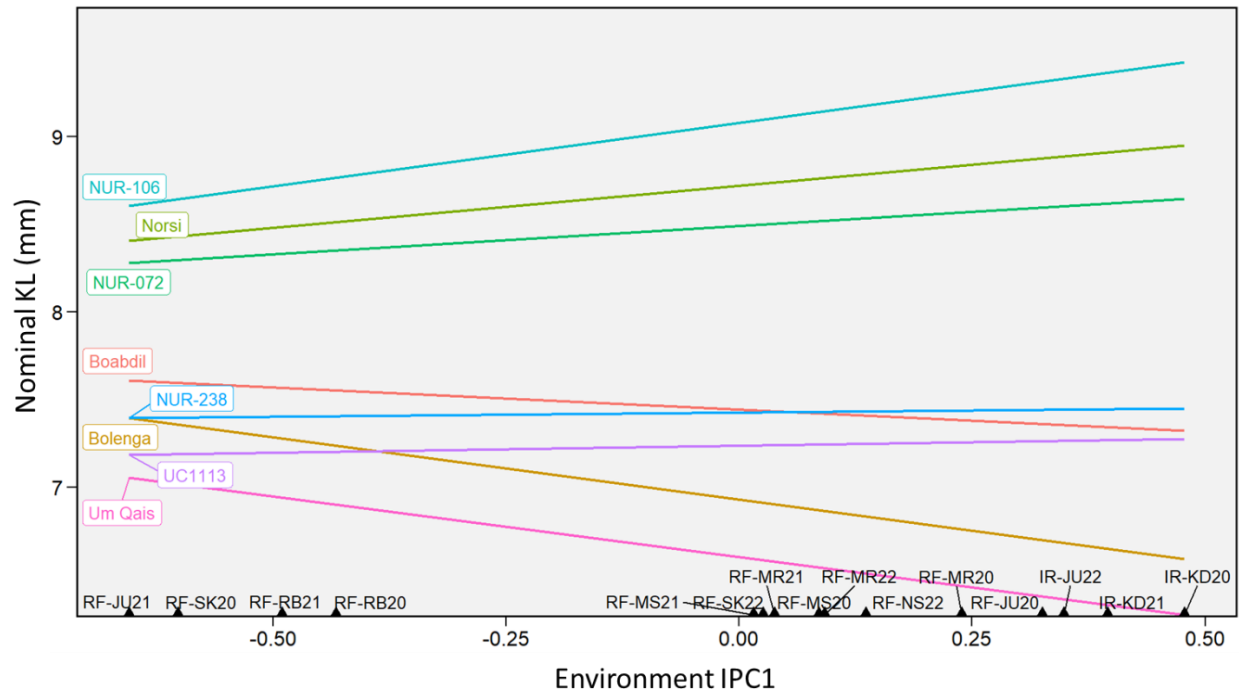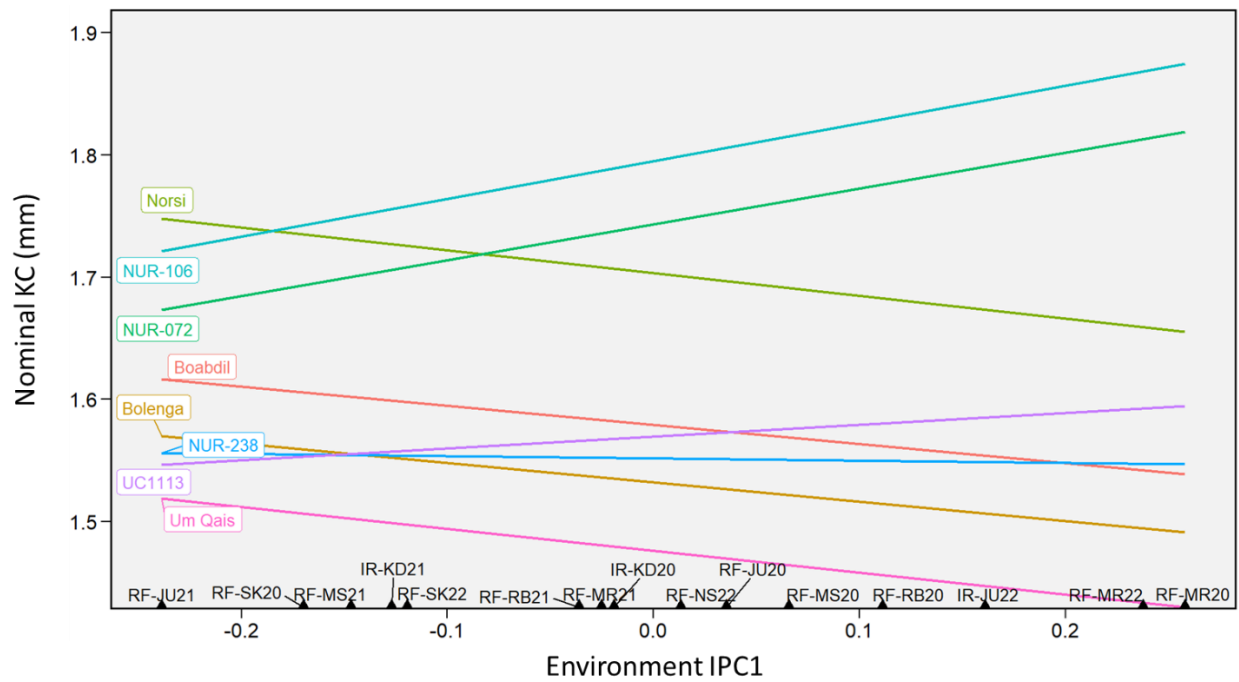

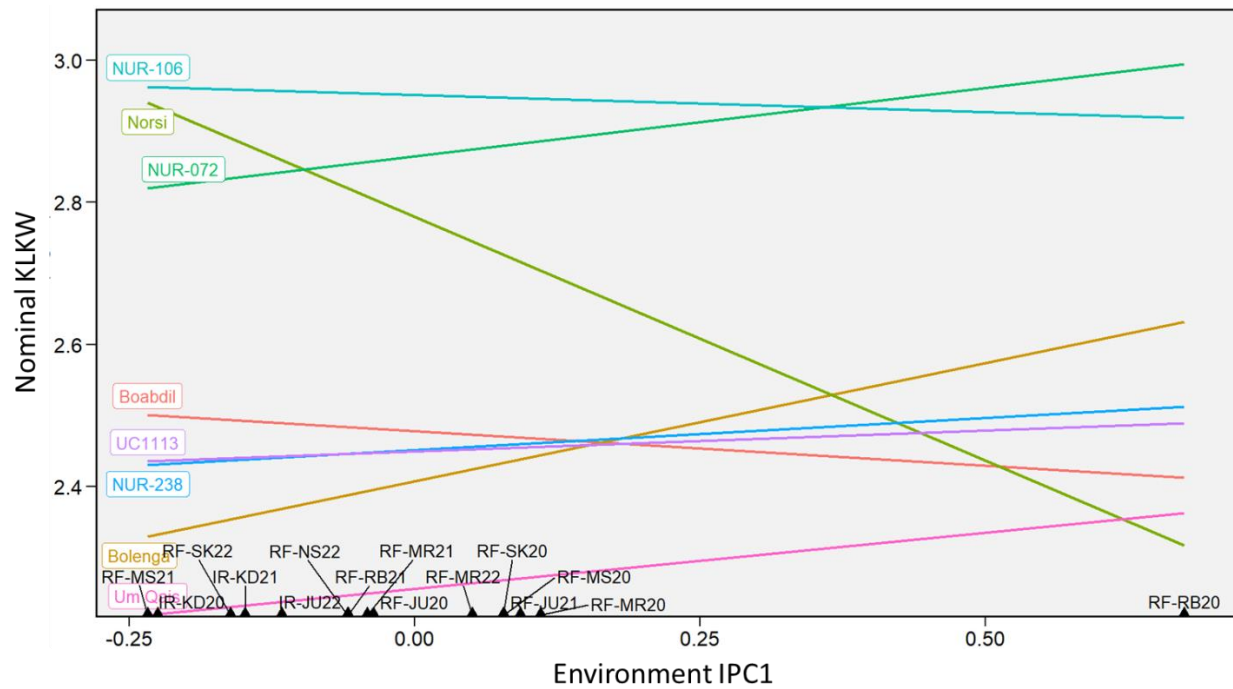

**Figure S4.** Nominal analysis for kernel-related traits (KA, KW, KL, KC and KL:KW) of eight durum genotypes as a function of the IPC1 scores of 15 tested environments.
