# Supplementary material for: Performance and Stability Analysis of Selected Durum Wheat Genotypes Differing in Their Kernel Characteristics
Source: MDPI journal article supplement (doi:10.3390/plants12142664), 2023-07-16
Supplement: s1 [file s1]

Table S1. Rainfall amounts (mm on monthly basis) and average maximum and minimum temperatures (°C on monthly basis) in the tested environments.

| Environment |          | November | December | January | February | March  | April | May   | June  | Total  |
|-------------|----------|----------|----------|---------|----------|--------|-------|-------|-------|--------|
| RF-JU20     | Maximum  | 21.91    | 15.12    | 10.91   | 13.48    | 17.85  | 21.88 | 29.21 | 30.76 |        |
|             | Minimum  | 9.84     | 5.79     | 4.80    | 6.28     | 8.37   | 10.71 | 15.25 | 17.47 |        |
|             | Rainfall | 12.50    | 153.30   | 234.30  | 103.50   | 187.80 | 24.50 | 27.00 | 0.00  | 742.90 |
| IR-KD20     | Maximum  | 23.00    | 15.60    | 11.92   | 14.91    | 18.13  | 25.31 | 30.97 | 32.03 |        |
|             | Minimum  | 9.10     | 4.00     | 3.00    | 3.94     | 6.74   | 8.94  | 12.66 | 13.86 |        |
|             | Rainfall | 12.90    | 44.50    | 39.90   | 42.40    | 66.50  | 15.80 | 7.50  | 0.00  | 229.50 |
| RF-MR20     | Maximum  | 26.10    | 17.30    | 12.20   | 14.40    | 19.90  | 24.30 | 31.30 | 31.10 |        |
|             | Minimum  | 8.50     | 6.20     | 4.50    | 3.00     | 6.70   | 11.00 | 14.10 | 16.90 |        |
|             | Rainfall | 5.10     | 104.60   | 135.10  | 64.00    | 85.30  | 28.40 | 18.50 | 0.00  | 441.16 |
| RF-MS20     | Maximum  | 28.00    | 15.90    | 11.70   | 13.60    | 19.41  | 23.63 | 30.67 | 32.43 |        |
|             | Minimum  | 2.00     | 5.50     | 3.20    | 4.60     | 6.09   | 7.06  | 12.12 | 13.26 |        |
|             | Rainfall | 21.70    | 66.70    | 152.50  | 84.80    | 111.80 | 3.80  | 13.10 | 0.00  | 454.40 |
| RF-RB20     | Maximum  | 22.00    | 14.80    | 10.50   | 12.50    | 17.30  | 21.70 | 29.30 | 30.42 |        |
|             | Minimum  | 9.80     | 5.30     | 3.60    | 4.60     | 6.80   | 7.40  | 11.50 | 18.50 |        |
|             | Rainfall | 6.50     | 31.50    | 195.80  | 26.80    | 108.00 | 4.00  | 2.50  | 0.00  | 375.10 |
| RF-SK20     | Maximum  | 19.33    | 12.72    | 13.14   | 12.02    | 15.36  | 18.63 | 28.90 | 30.81 |        |
|             | Minimum  | 4.21     | 2.85     | -1.33   | -1.10    | 0.52   | 4.51  | 9.81  | 10.64 |        |
|             | Rainfall | 0.20     | 19.10    | 1.40    | 95.80    | 112.50 | 2.00  | 10.80 | 0.00  | 241.80 |
| RF-JU21     | Maximum  | 20.87    | 18.74    | 16.00   | 17.05    | 15.84  | 25.01 | 30.55 | 29.37 |        |
|             | Minimum  | 8.90     | 4.20     | 1.30    | 4.50     | 5.70   | 7.50  | 15.90 | 16.40 |        |
|             | Rainfall | 19.70    | 108.50   | 206.90  | 167.30   | 107.50 | 7.70  | 0.00  | 0.00  | 617.60 |

| Environment |          | November | December | January | February | March | April     | May   | June  | Total  |
|-------------|----------|----------|----------|---------|----------|-------|-----------|-------|-------|--------|
| IR-KD21     | Maximum  | 25.60    | 25.22    | 20.61   | 22.77    | 17.50 | 28.46     | 32.37 | 34.45 |        |
|             | Minimum  | 6.41     | 1.89     | -2.17   | 0.79     | 1.43  | 2.76      | 12.13 | 12.53 |        |
|             | Rainfall | 0.00     | 28.00    | 32.70   | 38.00    | 3.50  | 0.00      | 0.00  | 0.00  | 102.00 |
| RF-MS21     | Maximum  | 24.87    | 22.74    | 19.62   | 20.05    | 18.84 | 28.30     | 32.55 | 33.21 |        |
|             | Minimum  | 10.05    | 6.48     | 1.31    | 4.46     | 5.73  | 7.49      | 15.87 | 16.36 |        |
|             | Rainfall | 41.90    | 15.00    | 119.50  | 68.00    | 47.30 | 0.00      | 0.00  | 0.00  | 291.70 |
| RF-MR21     | Maximum  | 22.50    | 18.10    | 16.50   | 17.60    | 16.90 | 26.40     | 31.30 | 30.70 |        |
|             | Minimum  | 13.20    | 7.10     | 5.90    | 5.60     | 5.90  | 10.70     | 15.80 | 16.20 |        |
|             | Rainfall | 63.00    | 49.00    | 107.50  | 138.00   | 43.00 | 0.00      | 0.00  | 0.00  | 400.50 |
| RF-RB21     | Maximum  | 21.22    | 19.01    | 16.73   | 16.87    | 15.75 | 28.24     | 30.51 | 28.92 |        |
|             | Minimum  | 11.60    | 7.71     | 2.69    | 4.59     | 7.23  | 8.23      | 17.39 | 18.12 |        |
|             | Rainfall | 39.00    | 20.50    | 66.80   | 48.50    | 17.40 | 0.00      | 0.00  | 0.00  | 192.20 |
| IR-JU22     | Maximum  | 27.40    | 20.10    | 10.50   | 12.50    | 12.80 | 26.60     | 27.20 | 30.12 |        |
|             | Minimum  | 10.00    | 7.70     | 2.60    | 3.80     | 2.00  | 10.00     | 11.90 | 15.40 |        |
|             | Rainfall | 21.90    | 108.50   | 173.00  | 159.90   | 97.90 | 10.50     | 0.00  | 0.00  | 581.00 |
| RF-NS22     | Maximum  | 27.90    | 20.00    | 16.80   | 19.40    | 19.70 | 31.90     | 33.50 | 37.50 |        |
|             | Minimum  | 15.20    | 9.60     | 5.30    | 7.40     | 7.00  | 13.80     | 16.60 | 20.60 |        |
|             | Rainfall | 18.70    | 68.60    | 89.50   | 51.50    | 71.00 | 5.50      | 1.00  | 0.00  | 305.80 |
| RF-MR22     | Maximum  | 26.60    | 20.60    | 16.60   | 19.20    | 19.90 | 29.60     | 31.50 | 33.10 |        |
|             | Minimum  | 16.00    | 10.10    | 6.50    | 8.50     | 8.30  | 15.60     | 18.60 | 18.50 |        |
|             | Rainfall | 12.50    | 105.50   | 109.90  | 53.35    | 94.00 | 0.00      | 0.00  | 0.00  | 375.25 |
| RF-SK22     | Maximum  | 20.80    | 13.30    | 8.50    | 11.70    | 13.40 | 25.70     | 24.40 | 28.10 |        |
|             | Minimum  | 3.30     | -0.30    | -2.70   | -2.00    | -1.50 | 5.50      | 7.90  | 11.10 |        |
|             | Rainfall | 4.40     | 8.80     | 68.20   | 24.60    | 7.60  | 100 (S.I) | 0.00  | 0.00  | 213.60 |
