# Supplementary material for: Performance and Stability Analysis of Selected Durum Wheat Genotypes Differing in Their Kernel Characteristics
Source: MDPI journal article supplement (doi:10.3390/plants12142664), 2023-07-16
Supplement: s1 [file s1]

Table S3. Individual environments and combined overall BLUPs values for nine traits recorded in eight durum wheat tested across 15 environments.

| Environment | Genotype | BLUP_TW  | BLUP_GY | BLUP_HI | BLUP_TKW | BLUP_KA | BLUP_KW | BLUP_KL | BLUP_KC | BLUP_KLKW |
|-------------|----------|----------|---------|---------|----------|---------|---------|---------|---------|-----------|
| IR-JU22     | Boabdil  | 2022.027 | 747.528 | 37.231  | 51.118   | 19.936  | 3.496   | 7.801   | NA      | 2.235     |
|             | Bolenga  | 2062.195 | 767.301 | 37.124  | 49.883   | 19.138  | 3.558   | 7.302   | NA      | 2.070     |
|             | Norsi    | 2022.027 | 596.571 | 29.916  | 64.877   | 24.357  | 3.527   | 9.298   | NA      | 2.631     |
|             | NUR-072  | 2148.555 | 800.002 | 36.452  | 62.255   | 23.127  | 3.435   | 9.231   | NA      | 2.697     |
|             | NUR-106  | 2117.426 | 741.444 | 34.502  | 60.837   | 24.523  | 3.435   | 9.896   | NA      | 2.895     |
|             | NUR-238  | 1996.922 | 586.684 | 29.904  | 49.239   | 19.238  | 3.404   | 7.768   | NA      | 2.301     |
|             | UC1113   | 1984.370 | 733.839 | 37.592  | 44.606   | 18.207  | 3.282   | 7.635   | NA      | 2.367     |
|             | Um Qais  | 2089.810 | 730.797 | 34.709  | 47.908   | 17.509  | 3.496   | 6.803   | NA      | 2.004     |
| LSD(0.05)   |          | 145.595  | 73.388  | 3.384   | 1.499    | 0.453   | 0.078   | 0.158   |         | 0.098     |
| IR-KD20     | Boabdil  | 1856.294 | 632.752 | 34.170  | 40.457   | 17.452  | 3.149   | 7.470   | 1.527   | 2.387     |
|             | Bolenga  | 1579.674 | 589.266 | 37.818  | 34.859   | 15.221  | 2.978   | 6.841   | 1.494   | 2.314     |
|             | Norsi    | 1500.113 | 434.209 | 30.537  | 53.696   | 22.023  | 3.205   | 9.164   | 1.719   | 2.881     |
|             | NUR-072  | 1982.387 | 707.687 | 35.248  | 57.826   | 22.809  | 3.264   | 9.260   | 1.699   | 2.855     |
|             | NUR-106  | 1610.606 | 638.309 | 39.878  | 58.904   | 24.283  | 3.408   | 9.665   | 1.729   | 2.848     |
|             | NUR-238  | 1809.137 | 722.203 | 39.146  | 56.493   | 21.322  | 3.546   | 8.041   | 1.471   | 2.278     |
|             | UC1113   | 1830.403 | 733.527 | 39.154  | 48.685   | 19.752  | 3.379   | 7.921   | 1.524   | 2.364     |
|             | Um Qais  | 1639.605 | 554.678 | 34.642  | 44.710   | 17.141  | 3.389   | 6.791   | 1.375   | 2.012     |
| LSD(0.05)   |          | 296.341  | 113.150 | 5.542   | 2.735    | 0.887   | 0.066   | 0.253   | 0.034   | 0.071     |
| IR-KD21     | Boabdil  | 985.566  | 436.163 | 44.888  | 50.010   | 19.774  | 3.334   | 8.006   | 1.570   | 2.440     |
|             | Bolenga  | 1438.743 | 786.008 | 53.323  | 39.029   | 16.307  | 3.117   | 7.158   | 1.541   | 2.350     |
|             | Norsi    | 1023.903 | 303.042 | 30.621  | 54.023   | 22.943  | 3.334   | 9.245   | 1.716   | 2.769     |
|             | NUR-072  | 1311.309 | 560.241 | 42.691  | 61.198   | 23.241  | 3.427   | 9.082   | 1.629   | 2.650     |
|             | NUR-106  | 1199.021 | 609.799 | 50.300  | 59.712   | 25.552  | 3.520   | 9.799   | 1.774   | 2.889     |
|             | NUR-238  | 1056.205 | 424.942 | 40.633  | 54.939   | 21.425  | 3.489   | 8.266   | 1.541   | 2.380     |
|             | UC1113   | 1145.776 | 521.714 | 45.789  | 47.677   | 19.708  | 3.427   | 7.810   | 1.512   | 2.291     |
|             | Um Qais  | 1075.610 | 544.385 | 50.515  | 35.761   | 15.218  | 3.117   | 6.701   | 1.483   | 2.231     |
| LSD(0.05)   |          | 167.824  | 94.209  | 7.464   | 3.018    | 1.045   | 0.130   | 0.479   | 0.119   | 0.246     |

| Environment | Genotype | BLUP_TW  | BLUP_GY | BLUP_HI | BLUP_TKW | BLUP_KA | BLUP_KW | BLUP_KL | BLUP_KC | BLUP_KLKW |
|-------------|----------|----------|---------|---------|----------|---------|---------|---------|---------|-----------|
| RF-JU20     | Boabdil  | 1299.949 | 395.821 | 26.900  | 37.615   | 16.898  | 3.043   | 7.477   | 1.571   | 2.479     |
|             | Bolenga  | 1517.917 | 570.691 | 31.314  | 28.341   | 14.043  | 2.827   | 6.675   | 1.529   | 2.395     |
|             | Norsi    | 2142.535 | 431.963 | 17.037  | 54.318   | 22.471  | 3.298   | 9.141   | 1.695   | 2.789     |
|             | NUR-072  | 1322.421 | 420.315 | 26.470  | 42.685   | 18.791  | 2.991   | 8.472   | 1.730   | 2.847     |
|             | NUR-106  | 1437.611 | 482.492 | 28.009  | 47.835   | 21.795  | 3.144   | 9.450   | 1.818   | 3.027     |
|             | NUR-238  | 1122.739 | 281.143 | 20.926  | 34.438   | 15.254  | 2.948   | 6.958   | 1.523   | 2.385     |
|             | UC1113   | 1291.595 | 395.156 | 25.378  | 29.282   | 15.111  | 2.857   | 7.198   | 1.610   | 2.551     |
|             | Um Qais  | 1678.530 | 578.039 | 28.693  | 34.522   | 14.765  | 3.030   | 6.592   | 1.497   | 2.251     |
| LSD(0.05)   |          | 116.114  | 49.799  | 2.690   | 1.234    | 0.426   | 0.066   | 0.144   | 0.059   | 0.124     |

|           |         |          |         |        |        |        |       |       |       |       |
|-----------|---------|----------|---------|--------|--------|--------|-------|-------|-------|-------|
| RF-JU21   | Boabdil | 908.374  | 320.349 | 35.990 | 31.829 | 15.842 | 2.863 | 7.503 | 1.670 | 2.702 |
|           | Bolenga | 986.600  | 421.168 | 41.871 | 34.597 | 16.490 | 2.917 | 7.600 | 1.670 | 2.676 |
|           | Norsi   | 915.264  | 251.394 | 27.946 | 45.060 | 19.537 | 2.999 | 8.635 | 1.710 | 2.864 |
|           | NUR-072 | 947.848  | 289.609 | 30.679 | 34.240 | 16.976 | 2.808 | 8.117 | 1.730 | 2.891 |
|           | NUR-106 | 912.456  | 327.685 | 36.495 | 36.318 | 17.916 | 2.917 | 8.182 | 1.710 | 2.810 |
|           | NUR-238 | 985.443  | 367.158 | 36.753 | 30.557 | 14.902 | 2.754 | 7.244 | 1.650 | 2.676 |
|           | UC1113  | 875.549  | 246.996 | 29.277 | 27.710 | 14.513 | 2.808 | 6.953 | 1.630 | 2.541 |
|           | Um Qais | 1035.184 | 463.678 | 43.525 | 26.699 | 13.022 | 2.699 | 6.565 | 1.630 | 2.541 |
| LSD(0.05) |         | 100.858  | 45.999  | 4.711  | 2.411  | 1.051  | 0.140 | 0.365 | 0.094 | 0.199 |

|           |         |         |         |        |        |        |       |       |       |       |
|-----------|---------|---------|---------|--------|--------|--------|-------|-------|-------|-------|
| RF-MR20   | Boabdil | 873.779 | 256.191 | 29.156 | 34.193 | 15.746 | 2.996 | 7.131 | 1.561 | 2.421 |
|           | Bolenga | 815.494 | 265.746 | 33.040 | 30.984 | 15.156 | 2.907 | 7.003 | 1.567 | 2.453 |
|           | Norsi   | 774.777 | 166.492 | 22.286 | 47.340 | 20.927 | 3.142 | 8.839 | 1.716 | 2.780 |
|           | NUR-072 | 939.904 | 312.402 | 32.380 | 36.729 | 17.998 | 2.861 | 8.695 | 1.862 | 3.050 |
|           | NUR-106 | 937.757 | 246.452 | 25.763 | 36.263 | 19.194 | 2.961 | 8.982 | 1.880 | 3.032 |
|           | NUR-238 | 813.676 | 191.570 | 23.924 | 29.677 | 15.606 | 2.820 | 7.574 | 1.707 | 2.726 |
|           | UC1113  | 845.129 | 250.432 | 29.726 | 28.040 | 14.984 | 2.836 | 7.274 | 1.659 | 2.613 |
|           | Um Qais | 885.650 | 270.923 | 30.208 | 26.717 | 13.133 | 2.842 | 6.292 | 1.495 | 2.275 |
| LSD(0.05) |         | 130.645 | 59.351  | 5.064  | 3.498  | 1.175  | 0.160 | 0.646 | 0.144 | 0.301 |

| Environment | Genotype | BLUP_TW | BLUP_GY | BLUP_HI | BLUP_TKW | BLUP_KA | BLUP_KW | BLUP_KL | BLUP_KC | BLUP_KLKW |
|-------------|----------|---------|---------|---------|----------|---------|---------|---------|---------|-----------|
|-------------|----------|---------|---------|---------|----------|---------|---------|---------|---------|-----------|

|                  |                |               |               |              |              |              |              |              |              |              |
|------------------|----------------|---------------|---------------|--------------|--------------|--------------|--------------|--------------|--------------|--------------|
| <b>RF-MR21</b>   | <b>Boabdil</b> | 690.403       | 186.984       | 26.966       | 31.959       | 16.169       | 2.900        | 7.435        | 1.602        | 2.572        |
|                  | <b>Bolenga</b> | 777.279       | 222.393       | 28.485       | 26.441       | 13.526       | 2.755        | 6.646        | 1.569        | 2.479        |
|                  | <b>Norsi</b>   | 784.385       | 187.264       | 24.010       | 43.935       | 19.769       | 3.045        | 8.685        | 1.698        | 2.852        |
|                  | <b>NUR-072</b> | 804.792       | 209.404       | 26.232       | 37.690       | 18.051       | 2.929        | 8.258        | 1.762        | 2.821        |
|                  | <b>NUR-106</b> | 796.642       | 195.567       | 24.584       | 36.696       | 20.099       | 3.016        | 9.014        | 1.795        | 3.007        |
|                  | <b>NUR-238</b> | 780.962       | 227.062       | 28.943       | 32.252       | 15.772       | 2.929        | 7.238        | 1.602        | 2.541        |
|                  | <b>UC1113</b>  | 708.463       | 190.856       | 27.099       | 26.209       | 14.022       | 2.813        | 6.777        | 1.602        | 2.479        |
|                  | <b>Um Qais</b> | 772.324       | 201.011       | 26.046       | 27.141       | 13.559       | 2.813        | 6.580        | 1.537        | 2.417        |
| <b>LSD(0.05)</b> |                | <b>92.433</b> | <b>33.809</b> | <b>3.964</b> | <b>2.922</b> | <b>0.780</b> | <b>0.120</b> | <b>0.333</b> | <b>0.055</b> | <b>0.177</b> |

|                  |                |               |               |              |              |              |              |              |    |              |
|------------------|----------------|---------------|---------------|--------------|--------------|--------------|--------------|--------------|----|--------------|
| <b>RF-MR22</b>   | <b>Boabdil</b> | 908.706       | 227.216       | 24.397       | 33.879       | 16.017       | 2.906        | 7.470        | NA | 2.634        |
|                  | <b>Bolenga</b> | 880.870       | 226.888       | 25.566       | 31.723       | 14.503       | 2.906        | 6.743        | NA | 2.404        |
|                  | <b>Norsi</b>   | 900.753       | 237.707       | 25.914       | 50.769       | 21.218       | 3.220        | 8.824        | NA | 2.765        |
|                  | <b>NUR-072</b> | 882.858       | 255.414       | 28.838       | 34.264       | 16.873       | 2.748        | 8.361        | NA | 3.093        |
|                  | <b>NUR-106</b> | 864.963       | 270.825       | 31.844       | 40.811       | 19.770       | 2.937        | 9.121        | NA | 3.125        |
|                  | <b>NUR-238</b> | 918.648       | 351.621       | 37.966       | 41.822       | 17.828       | 3.126        | 7.635        | NA | 2.470        |
|                  | <b>UC1113</b>  | 821.220       | 225.250       | 28.450       | 37.335       | 17.136       | 3.094        | 7.569        | NA | 2.503        |
|                  | <b>Um Qais</b> | 918.648       | 262.629       | 27.928       | 37.766       | 15.754       | 3.063        | 6.677        | NA | 2.273        |
| <b>LSD(0.05)</b> |                | <b>81.826</b> | <b>45.853</b> | <b>3.379</b> | <b>2.052</b> | <b>0.747</b> | <b>0.112</b> | <b>0.264</b> |    | <b>0.125</b> |

|                  |                |                |               |              |              |              |              |              |              |              |
|------------------|----------------|----------------|---------------|--------------|--------------|--------------|--------------|--------------|--------------|--------------|
| <b>RF-MS20</b>   | <b>Boabdil</b> | 953.047        | 336.011       | 34.944       | 36.504       | 16.575       | 3.099        | 7.337        | 1.568        | 2.403        |
|                  | <b>Bolenga</b> | 946.096        | 366.671       | 38.349       | 32.713       | 15.156       | 3.005        | 6.844        | 1.505        | 2.338        |
|                  | <b>Norsi</b>   | 945.464        | 183.624       | 19.813       | 52.090       | 21.162       | 3.255        | 8.652        | 1.631        | 2.630        |
|                  | <b>NUR-072</b> | 965.211        | 348.647       | 35.785       | 38.612       | 17.829       | 2.943        | 8.258        | 1.725        | 2.824        |
|                  | <b>NUR-106</b> | 1070.340       | 362.887       | 32.867       | 45.781       | 21.657       | 3.255        | 9.080        | 1.757        | 2.856        |
|                  | <b>NUR-238</b> | 785.045        | 226.441       | 30.528       | 39.031       | 16.740       | 3.099        | 7.272        | 1.505        | 2.338        |
|                  | <b>UC1113</b>  | 785.045        | 266.395       | 35.184       | 31.014       | 15.651       | 2.943        | 7.206        | 1.600        | 2.468        |
|                  | <b>Um Qais</b> | 874.852        | 307.953       | 35.486       | 31.990       | 14.463       | 3.036        | 6.384        | 1.442        | 2.144        |
| <b>LSD(0.05)</b> |                | <b>151.203</b> | <b>41.880</b> | <b>4.616</b> | <b>2.251</b> | <b>0.820</b> | <b>0.099</b> | <b>0.334</b> | <b>0.082</b> | <b>0.130</b> |

| <b>Environment</b> | <b>Genotype</b> | <b>BLUP_TW</b> | <b>BLUP_GY</b> | <b>BLUP_HI</b> | <b>BLUP_TKW</b> | <b>BLUP_KA</b> | <b>BLUP_KW</b> | <b>BLUP_KL</b> | <b>BLUP_KC</b> | <b>BLUP_KLKW</b> |
|--------------------|-----------------|----------------|----------------|----------------|-----------------|----------------|----------------|----------------|----------------|------------------|
| <b>RF-MS21</b>     | <b>Boabdil</b>  | 647.390        | 187.254        | 28.921         | 34.059          | 16.008         | 3.001          | 7.201          | NA             | 2.434            |

|                  |                |               |               |              |              |              |              |              |    |              |
|------------------|----------------|---------------|---------------|--------------|--------------|--------------|--------------|--------------|----|--------------|
|                  | <b>Bolenga</b> | 835.853       | 263.685       | 31.159       | 30.364       | 13.774       | 2.890        | 6.274        | NA | 2.203        |
|                  | <b>Norsi</b>   | 528.772       | 65.155        | 12.301       | 36.422       | 18.736       | 3.028        | 8.327        | NA | 2.796        |
|                  | <b>NUR-072</b> | 672.619       | 216.405       | 32.040       | 42.273       | 18.440       | 3.084        | 7.962        | NA | 2.598        |
|                  | <b>NUR-106</b> | 555.804       | 144.729       | 26.007       | 42.433       | 19.525       | 3.028        | 8.591        | NA | 2.829        |
|                  | <b>NUR-238</b> | 585.222       | 180.059       | 30.873       | 37.473       | 16.501       | 3.028        | 7.168        | NA | 2.368        |
|                  | <b>UC1113</b>  | 620.786       | 159.129       | 25.592       | 32.053       | 15.746       | 3.001        | 7.002        | NA | 2.368        |
|                  | <b>Um Qais</b> | 696.287       | 236.147       | 34.017       | 31.849       | 14.037       | 2.973        | 6.274        | NA | 2.137        |
| <b>LSD(0.05)</b> |                | <b>87.986</b> | <b>42.504</b> | <b>5.090</b> | <b>2.949</b> | <b>0.779</b> | <b>0.077</b> | <b>0.222</b> |    | <b>0.084</b> |

|                  |                |                |                |              |              |              |              |              |              |              |
|------------------|----------------|----------------|----------------|--------------|--------------|--------------|--------------|--------------|--------------|--------------|
| <b>RF-NS22</b>   | <b>Boabdil</b> | 1972.276       | 502.118        | 25.370       | 45.888       | 19.330       | 3.267        | 7.935        | 1.557        | 2.447        |
|                  | <b>Bolenga</b> | 1438.425       | 394.501        | 27.447       | 47.664       | 19.839       | 3.340        | 7.968        | 1.534        | 2.401        |
|                  | <b>Norsi</b>   | 1398.881       | 238.037        | 17.219       | 51.831       | 22.938       | 3.328        | 9.359        | 1.726        | 2.839        |
|                  | <b>NUR-072</b> | 1998.132       | 500.591        | 25.041       | 48.778       | 21.119       | 3.142        | 9.114        | 1.769        | 2.929        |
|                  | <b>NUR-106</b> | 2156.310       | 504.865        | 23.503       | 54.993       | 24.761       | 3.340        | 9.984        | 1.792        | 3.005        |
|                  | <b>NUR-238</b> | 2084.826       | 586.837        | 27.933       | 46.951       | 19.323       | 3.300        | 7.868        | 1.527        | 2.391        |
|                  | <b>UC1113</b>  | 1201.158       | 320.467        | 26.449       | 37.006       | 17.212       | 3.124        | 7.486        | 1.560        | 2.427        |
|                  | <b>Um Qais</b> | 1491.658       | 428.084        | 28.724       | 34.231       | 15.182       | 3.039        | 6.736        | 1.488        | 2.251        |
| <b>LSD(0.05)</b> |                | <b>349.167</b> | <b>104.424</b> | <b>3.912</b> | <b>4.457</b> | <b>1.133</b> | <b>0.111</b> | <b>0.202</b> | <b>0.033</b> | <b>0.053</b> |

|                  |                |                |               |              |              |              |              |              |              |              |
|------------------|----------------|----------------|---------------|--------------|--------------|--------------|--------------|--------------|--------------|--------------|
| <b>RF-RB20</b>   | <b>Boabdil</b> | 1024.728       | 467.852       | 44.598       | 34.435       | 16.560       | 2.965        | 7.488        | 1.597        | 2.491        |
|                  | <b>Bolenga</b> | 896.907        | 387.002       | 43.454       | 35.700       | 17.220       | 2.977        | 7.706        | 1.615        | 2.712        |
|                  | <b>Norsi</b>   | 757.196        | 293.174       | 41.511       | 38.144       | 18.228       | 3.103        | 7.981        | 1.623        | 2.408        |
|                  | <b>NUR-072</b> | 871.951        | 261.495       | 30.160       | 37.258       | 18.041       | 2.919        | 8.467        | 1.806        | 2.995        |
|                  | <b>NUR-106</b> | 971.221        | 371.365       | 37.776       | 38.830       | 19.752       | 3.070        | 8.907        | 1.817        | 2.986        |
|                  | <b>NUR-238</b> | 899.879        | 338.422       | 37.751       | 35.254       | 16.743       | 2.984        | 7.540        | 1.594        | 2.539        |
|                  | <b>UC1113</b>  | 950.412        | 413.621       | 43.180       | 34.746       | 16.692       | 2.972        | 7.528        | 1.603        | 2.542        |
|                  | <b>Um Qais</b> | 992.030        | 429.591       | 42.531       | 33.907       | 15.824       | 2.956        | 7.127        | 1.535        | 2.467        |
| <b>LSD(0.05)</b> |                | <b>155.192</b> | <b>71.094</b> | <b>4.672</b> | <b>5.598</b> | <b>2.702</b> | <b>0.122</b> | <b>1.020</b> | <b>0.116</b> | <b>0.242</b> |

| <b>Environment</b> | <b>Genotype</b> | <b>BLUP_TW</b> | <b>BLUP_GY</b> | <b>BLUP_HI</b> | <b>BLUP_TKW</b> | <b>BLUP_KA</b> | <b>BLUP_KW</b> | <b>BLUP_KL</b> | <b>BLUP_KC</b> | <b>BLUP_KLKW</b> |
|--------------------|-----------------|----------------|----------------|----------------|-----------------|----------------|----------------|----------------|----------------|------------------|
| <b>RF-RB21</b>     | <b>Boabdil</b>  | 327.841        | 40.883         | 17.160         | 19.647          | 12.829         | 2.601          | 6.784          | 1.701          | 2.674            |
|                    | <b>Bolenga</b>  | 346.842        | 104.686        | 18.140         | 18.570          | 11.263         | 2.415          | 6.281          | 1.642          | 2.644            |

|                  |                |               |               |              |              |              |              |              |              |              |
|------------------|----------------|---------------|---------------|--------------|--------------|--------------|--------------|--------------|--------------|--------------|
|                  | <b>Norsi</b>   | 321.051       | 40.251        | 9.001        | 21.165       | 14.171       | 2.570        | 7.666        | 1.820        | 2.972        |
|                  | <b>NUR-072</b> | 304.492       | 35.296        | 18.761       | 22.996       | 14.363       | 2.632        | 7.603        | 1.820        | 2.942        |
|                  | <b>NUR-106</b> | 307.410       | 52.287        | 12.325       | 24.689       | 15.962       | 2.694        | 8.169        | 1.880        | 3.061        |
|                  | <b>NUR-238</b> | 309.495       | 49.354        | 14.592       | 21.712       | 13.212       | 2.663        | 6.784        | 1.612        | 2.585        |
|                  | <b>UC1113</b>  | 281.202       | 15.891        | 19.074       | 18.429       | 12.254       | 2.570        | 6.564        | 1.642        | 2.555        |
|                  | <b>Um Qais</b> | 310.567       | 49.632        | 29.054       | 27.518       | 13.980       | 2.787        | 6.816        | 1.582        | 2.466        |
| <b>LSD(0.05)</b> |                | <b>47.795</b> | <b>16.109</b> | <b>3.148</b> | <b>2.475</b> | <b>0.905</b> | <b>0.091</b> | <b>0.478</b> | <b>0.118</b> | <b>0.233</b> |

|                  |                |               |               |              |              |              |              |              |              |              |
|------------------|----------------|---------------|---------------|--------------|--------------|--------------|--------------|--------------|--------------|--------------|
| <b>RF-SK20</b>   | <b>Boabdil</b> | 893.714       | 207.313       | 11.929       | 36.913       | 17.446       | 3.090        | 7.535        | 1.573        | 2.452        |
|                  | <b>Bolenga</b> | 913.855       | 201.980       | 28.473       | 31.901       | 15.325       | 2.966        | 7.028        | 1.551        | 2.428        |
|                  | <b>Norsi</b>   | 729.490       | 117.522       | 12.146       | 39.359       | 18.839       | 3.073        | 8.161        | 1.641        | 2.623        |
|                  | <b>NUR-072</b> | 872.106       | 246.878       | 11.744       | 38.211       | 18.332       | 3.055        | 8.102        | 1.641        | 2.648        |
|                  | <b>NUR-106</b> | 864.259       | 157.973       | 17.324       | 37.682       | 18.934       | 3.073        | 8.191        | 1.641        | 2.672        |
|                  | <b>NUR-238</b> | 750.077       | 194.422       | 16.027       | 33.086       | 16.465       | 3.020        | 7.326        | 1.573        | 2.452        |
|                  | <b>UC1113</b>  | 674.057       | 213.095       | 5.869        | 30.368       | 15.578       | 3.002        | 7.147        | 1.573        | 2.452        |
|                  | <b>Um Qais</b> | 1083.689      | 231.761       | 16.221       | 35.757       | 15.515       | 3.055        | 6.909        | 1.506        | 2.306        |
| <b>LSD(0.05)</b> |                | <b>69.399</b> | <b>33.426</b> | <b>3.336</b> | <b>3.862</b> | <b>1.069</b> | <b>0.120</b> | <b>0.554</b> | <b>0.104</b> | <b>0.236</b> |

|                  |                |               |               |              |              |              |              |              |              |              |
|------------------|----------------|---------------|---------------|--------------|--------------|--------------|--------------|--------------|--------------|--------------|
| <b>RF-SK22</b>   | <b>Boabdil</b> | 944.303       | 155.561       | 23.425       | 30.601       | 15.765       | 2.888        | 7.267        | 1.568        | 2.503        |
|                  | <b>Bolenga</b> | 957.656       | 175.478       | 22.214       | 23.706       | 12.254       | 2.697        | 6.137        | 1.504        | 2.374        |
|                  | <b>Norsi</b>   | 964.778       | 92.139        | 16.073       | 37.075       | 18.713       | 2.942        | 8.530        | 1.760        | 2.923        |
|                  | <b>NUR-072</b> | 969.229       | 189.630       | 28.224       | 33.977       | 16.825       | 2.806        | 7.965        | 1.696        | 2.858        |
|                  | <b>NUR-106</b> | 941.633       | 112.584       | 18.469       | 37.363       | 18.613       | 2.915        | 8.463        | 1.760        | 2.890        |
|                  | <b>NUR-238</b> | 963.888       | 145.602       | 25.886       | 30.271       | 14.771       | 2.861        | 6.901        | 1.536        | 2.438        |
|                  | <b>UC1113</b>  | 944.838       | 173.905       | 31.333       | 27.526       | 14.407       | 2.833        | 6.735        | 1.504        | 2.374        |
|                  | <b>Um Qais</b> | 955.342       | 274.545       | 21.609       | 23.706       | 12.353       | 2.724        | 6.303        | 1.504        | 2.374        |
| <b>LSD(0.05)</b> |                | <b>61.437</b> | <b>40.975</b> | <b>4.560</b> | <b>2.775</b> | <b>0.604</b> | <b>0.125</b> | <b>0.155</b> | <b>0.070</b> | <b>0.138</b> |

| <b>Environment</b>       | <b>Genotype</b> | <b>BLUP_TW</b> | <b>BLUP_GY</b> | <b>BLUP_HI</b> | <b>BLUP_TKW</b> | <b>BLUP_KA</b> | <b>BLUP_KW</b> | <b>BLUP_KL</b> | <b>BLUP_KC</b> | <b>BLUP_KLKW</b> |
|--------------------------|-----------------|----------------|----------------|----------------|-----------------|----------------|----------------|----------------|----------------|------------------|
| <b>Overall(combined)</b> | <b>Boabdil</b>  | 1082.122       | 339.834        | 29.736         | 36.557          | 16.799         | 3.043          | 7.445          | 1.586          | 2.479            |
|                          | <b>Bolenga</b>  | 1084.138       | 377.857        | 33.153         | 33.171          | 15.281         | 2.953          | 6.935          | 1.555          | 2.410            |

|                  |                |               |               |              |              |              |              |              |              |              |
|------------------|----------------|---------------|---------------|--------------|--------------|--------------|--------------|--------------|--------------|--------------|
|                  | <b>Norsi</b>   | 1062.932      | 249.996       | 22.452       | 45.989       | 20.424       | 3.138        | 8.715        | 1.711        | 2.777        |
|                  | <b>NUR-072</b> | 1105.204      | 355.802       | 29.371       | 41.960       | 18.874       | 3.005        | 8.486        | 1.749        | 2.862        |
|                  | <b>NUR-106</b> | 1093.983      | 346.670       | 29.292       | 44.029       | 20.893       | 3.113        | 9.070        | 1.791        | 2.947        |
|                  | <b>NUR-238</b> | 1071.479      | 327.448       | 29.527       | 38.147       | 16.986       | 3.060        | 7.429        | 1.566        | 2.453        |
|                  | <b>UC1113</b>  | 1043.635      | 325.616       | 30.044       | 33.348       | 16.042       | 2.996        | 7.240        | 1.580        | 2.451        |
|                  | <b>Um Qais</b> | 1087.934      | 366.971       | 32.117       | 33.325       | 14.720       | 3.000        | 6.609        | 1.495        | 2.260        |
| <b>LSD(0.05)</b> |                | <b>72.886</b> | <b>47.343</b> | <b>3.007</b> | <b>2.943</b> | <b>0.824</b> | <b>0.072</b> | <b>0.211</b> | <b>0.036</b> | <b>0.074</b> |
