# Supplementary material for: Performance and Stability Analysis of Selected Durum Wheat Genotypes Differing in Their Kernel Characteristics
Source: MDPI journal article supplement (doi:10.3390/plants12142664), 2023-07-16
Supplement: s1 [file s1]

Table S4. AMMI analysis of variance for GY, TKW and kernel-related traits in eight durum wheat genotypes tested across 15 different environments.

**Variable GY**

| Source    | Df  | Sum Sq   | Mean Sq | F value | Pr(>F)   | Proportion (%) | Accumulated |
|-----------|-----|----------|---------|---------|----------|----------------|-------------|
| ENV       | 14  | 11355146 | 811082  | 241.54  | 0        | 73.88          | NA          |
| REP(ENV)  | 30  | 100740   | 3358    | 2.3     | 0.000349 | 0.66           | NA          |
| GEN       | 7   | 679448   | 97064   | 66.38   | 8.5E-50  | 4.42           | NA          |
| GEN:ENV   | 98  | 1463940  | 14938   | 10.22   | 2.22E-44 | 9.52           | NA          |
|           |     |          |         |         |          |                |             |
| IPC1      | 20  | 602624   | 30131   | 20.61   | 0        | 41.2           | 41.2        |
| IPC2      | 18  | 357469   | 19859   | 13.58   | 0        | 24.4           | 65.6        |
| IPC3      | 16  | 199571   | 12473   | 8.53    | 0        | 13.6           | 79.2        |
| IPC4      | 14  | 113939   | 8138    | 5.57    | 0        | 7.8            | 87          |
| IPC5      | 12  | 98025    | 8169    | 5.59    | 0        | 6.7            | 93.7        |
| IPC6      | 10  | 73196    | 7320    | 5.01    | 0        | 5              | 98.7        |
| IPC7      | 8   | 19116    | 2390    | 1.63    | 0.118    | 1.3            | 100         |
|           |     |          |         |         |          |                |             |
| Residuals | 210 | 307085   | 1462    | NA      | NA       | NA             | NA          |
| Total     | 457 | 15370298 | 33633   | NA      | NA       | NA             | NA          |

**Variable TKW**

| Source    | Df  | Sum Sq  | Mean Sq   | F value | Pr(>F)    | Proportion (%) | Accumulated |
|-----------|-----|---------|-----------|---------|-----------|----------------|-------------|
| ENV       | 14  | 23857.7 | 1704.12   | 490.428 | 0         | 54.37          | NA          |
| REP(ENV)  | 30  | 104.2   | 3.47      | 0.877   | 0.654     | 0.24           | NA          |
| GEN       | 7   | 8986.3  | 1283.76 3 | 24.164  | 7.68E-109 | 20.48          | NA          |
| GEN:ENV   | 98  | 5050.9  | 51.54     | 13.014  | 6.6E-53   | 11.51          | NA          |
|           |     |         |           |         |           |                |             |
| IPC1      | 20  | 1783.7  | 89.19     | 22.52   | 0         | 35.3           | 35.5        |
| IPC2      | 18  | 1477.3  | 82.07     | 20.72   | 0         | 29.2           | 64.6        |
| IPC3      | 16  | 909     | 56.81     | 14.35   | 0         | 18             | 82.6        |
| IPC4      | 14  | 478     | 34.14     | 8.62    | 0         | 9.5            | 92          |
| IPC5      | 12  | 203     | 16.91     | 4.27    | 0         | 4              | 96          |
| IPC6      | 10  | 145.3   | 14.53     | 3.67    | 0.0002    | 2.9            | 98.9        |
| IPC7      | 8   | 54.7    | 6.83      | 1.73    | 0.093     | 1.1            | 100         |
|           |     |         |           |         |           |                |             |
| Residuals | 210 | 831.6   | 3.96      | NA      | NA        | NA             | NA          |
| Total     | 457 | 43881.7 | 96.02     | NA      | NA        | NA             | NA          |

#### Variable KA

| Source | Df | Sum Sq | Mean Sq | F value | Pr(>F) | Proportion (%) | Accumulated |
|--------|----|--------|---------|---------|--------|----------------|-------------|
|--------|----|--------|---------|---------|--------|----------------|-------------|

|                  |     |         |         |         |           |       |      |
|------------------|-----|---------|---------|---------|-----------|-------|------|
| <b>ENV</b>       | 14  | 1371.25 | 97.946  | 232.423 | 0         | 34.29 | NA   |
| <b>REP(ENV)</b>  | 30  | 12.64   | 0.421   | 0.877   | 0.654     | 0.32  | NA   |
| <b>GEN</b>       | 7   | 1741.52 | 248.788 | 517.858 | 1.06E-128 | 43.55 | NA   |
| <b>GEN:ENV</b>   | 98  | 386.43  | 3.943   | 8.208   | 3.77E-37  | 9.66  | NA   |
|                  |     |         |         |         |           |       |      |
| <b>IPC1</b>      | 20  | 136.82  | 6.841   | 14.24   | 0         | 35.4  | 35.4 |
| <b>IPC2</b>      | 18  | 120.6   | 6.7     | 13.95   | 0         | 31.2  | 66.6 |
| <b>IPC3</b>      | 16  | 57.31   | 3.582   | 7.46    | 0         | 14.8  | 81.4 |
| <b>IPC4</b>      | 14  | 31.38   | 2.241   | 4.67    | 0         | 8.1   | 89.6 |
| <b>IPC5</b>      | 12  | 22.66   | 1.888   | 3.93    | 0         | 5.9   | 95.4 |
| <b>IPC6</b>      | 10  | 12.95   | 1.295   | 2.7     | 0.0039    | 3.4   | 98.8 |
| <b>IPC7</b>      | 8   | 4.72    | 0.59    | 1.23    | 0.283     | 1.2   | 100  |
|                  |     |         |         |         |           |       |      |
| <b>Residuals</b> | 210 | 100.89  | 0.48    | NA      | NA        | NA    | NA   |
| <b>Total</b>     | 457 | 3999.16 | 8.751   | NA      | NA        | NA    | NA   |

#### Variable KW

| Source     | Df | Sum Sq  | Mean Sq | F value | Pr(>F) | Proportion (%) | Accumulated |
|------------|----|---------|---------|---------|--------|----------------|-------------|
| <b>ENV</b> | 14 | 15.9839 | 1.1417  | 193.05  | 0      | 62.15          | NA          |

|                  |     |         |         |       |          |       |      |
|------------------|-----|---------|---------|-------|----------|-------|------|
| <b>REP(ENV)</b>  | 30  | 0.1774  | 0.00591 | 1.2   | 0.228    | 0.69  | NA   |
| <b>GEN</b>       | 7   | 1.6932  | 0.24188 | 49.12 | 6.55E-41 | 6.58  | NA   |
| <b>GEN:ENV</b>   | 98  | 3.4156  | 0.03485 | 7.08  | 1.51E-32 | 13.28 | NA   |
|                  |     |         |         |       |          |       |      |
| <b>IPC1</b>      | 20  | 1.5496  | 0.07748 | 15.73 | 0        | 45.4  | 45.4 |
| <b>IPC2</b>      | 18  | 0.6806  | 0.03781 | 7.68  | 0        | 19.9  | 65.3 |
| <b>IPC3</b>      | 16  | 0.5276  | 0.03298 | 6.7   | 0        | 15.4  | 80.7 |
| <b>IPC4</b>      | 14  | 0.3817  | 0.02726 | 5.54  | 0        | 11.2  | 91.9 |
| <b>IPC5</b>      | 12  | 0.1782  | 0.01485 | 3.01  | 0.0006   | 5.2   | 97.1 |
| <b>IPC6</b>      | 10  | 0.0512  | 0.00512 | 1.04  | 0.411    | 1.5   | 98.6 |
| <b>IPC7</b>      | 8   | 0.0468  | 0.00585 | 1.19  | 0.306    | 1.4   | 100  |
|                  |     |         |         |       |          |       |      |
| <b>Residuals</b> | 210 | 1.0341  | 0.00492 | NA    | NA       | NA    | NA   |
| <b>Total</b>     | 457 | 25.7199 | 0.05628 | NA    | NA       | NA    | NA   |

#### Variable KL

| Source          | Df | Sum Sq | Mean Sq | F value | Pr(>F)   | Proportion (%) | Accumulated |
|-----------------|----|--------|---------|---------|----------|----------------|-------------|
| <b>ENV</b>      | 14 | 45.03  | 3.2164  | 45.985  | 2.22E-16 | 12.19          | NA          |
| <b>REP(ENV)</b> | 30 | 2.098  | 0.0699  | 0.975   | 0.509    | 0.57           | NA          |

|                  |     |         |         |         |           |       |      |
|------------------|-----|---------|---------|---------|-----------|-------|------|
| <b>GEN</b>       | 7   | 257.173 | 36.7389 | 512.115 | 3.21E-128 | 69.63 | NA   |
| <b>GEN:ENV</b>   | 98  | 24.991  | 0.255   | 3.555   | 7.65E-15  | 6.77  | NA   |
|                  |     |         |         |         |           |       |      |
| <b>IPC1</b>      | 20  | 11.083  | 0.5541  | 7.72    | 0         | 44.3  | 44.3 |
| <b>IPC2</b>      | 18  | 5.574   | 0.3096  | 4.32    | 0         | 22.3  | 66.6 |
| <b>IPC3</b>      | 16  | 3.83    | 0.2394  | 3.34    | 0         | 15.3  | 82   |
| <b>IPC4</b>      | 14  | 2.682   | 0.1916  | 2.67    | 0.0013    | 10.7  | 92.7 |
| <b>IPC5</b>      | 12  | 0.886   | 0.0738  | 1.03    | 0.422     | 3.5   | 96.3 |
| <b>IPC6</b>      | 10  | 0.604   | 0.0604  | 0.84    | 0.591     | 2.4   | 98.7 |
| <b>IPC7</b>      | 8   | 0.333   | 0.0416  | 0.58    | 0.794     | 1.3   | 100  |
|                  |     |         |         |         |           |       |      |
| <b>Residuals</b> | 210 | 15.065  | 0.0717  | NA      | NA        | NA    | NA   |
| <b>Total</b>     | 457 | 369.349 | 0.8082  | NA      | NA        | NA    | NA   |

#### Variable KC

| Source          | Df | Sum Sq | Mean Sq | F value | Pr(>F)   | Proportion (%) | Accumulated |
|-----------------|----|--------|---------|---------|----------|----------------|-------------|
| <b>ENV</b>      | 14 | 0.7736 | 0.05526 | 20.773  | 1.14E-11 | 11.53          | NA          |
| <b>REP(ENV)</b> | 30 | 0.0798 | 0.00266 | 0.961   | 0.529    | 1.19           | NA          |
| <b>GEN</b>      | 7  | 4.0406 | 0.57722 | 208.587 | 7.08E-91 | 60.22          | NA          |

|                  |     |        |         |       |             |      |      |
|------------------|-----|--------|---------|-------|-------------|------|------|
| <b>GEN:ENV</b>   | 98  | 0.6173 | 0.0063  | 2.276 | 0.000000375 | 9.20 | NA   |
|                  |     |        |         |       |             |      |      |
| <b>IPC1</b>      | 20  | 0.283  | 0.01415 | 5.11  | 0           | 45.9 | 45.9 |
| <b>IPC2</b>      | 18  | 0.1583 | 0.00879 | 3.18  | 0           | 25.6 | 71.5 |
| <b>IPC3</b>      | 16  | 0.0712 | 0.00445 | 1.61  | 0.0682      | 11.5 | 83   |
| <b>IPC4</b>      | 14  | 0.0435 | 0.0031  | 1.12  | 0.342       | 7    | 90.1 |
| <b>IPC5</b>      | 12  | 0.0344 | 0.00287 | 1.04  | 0.413       | 5.6  | 95.6 |
| <b>IPC6</b>      | 10  | 0.0153 | 0.00153 | 0.55  | 0.853       | 2.5  | 98.1 |
| <b>IPC7</b>      | 8   | 0.0116 | 0.00145 | 0.52  | 0.841       | 1.9  | 100  |
|                  |     |        |         |       |             |      |      |
| <b>Residuals</b> | 210 | 0.5811 | 0.00277 | NA    | NA          | NA   | NA   |
| <b>Total</b>     | 457 | 6.7096 | 0.01468 | NA    | NA          | NA   | NA   |

#### Variable KLKW

| Source          | Df | Sum Sq  | Mean Sq | F value | Pr(>F)   | Proportion (%) | Accumulated |
|-----------------|----|---------|---------|---------|----------|----------------|-------------|
| <b>ENV</b>      | 14 | 3.2724  | 0.23374 | 19.58   | 2.47E-11 | 10.22          | NA          |
| <b>REP(ENV)</b> | 30 | 0.3582  | 0.01194 | 1       | 0.466    | 1.12           | NA          |
| <b>GEN</b>      | 7  | 19.6568 | 2.80812 | 236.23  | 7.35E-96 | 61.40          | NA          |
| <b>GEN:ENV</b>  | 98 | 3.1146  | 0.03178 | 2.67    | 1.46E-09 | 9.73           | NA          |

|                  |     |         |         |      |        |      |      |
|------------------|-----|---------|---------|------|--------|------|------|
|                  |     |         |         |      |        |      |      |
| <b>IPC1</b>      | 20  | 1.3337  | 0.06668 | 5.61 | 0      | 42.8 | 42.8 |
| <b>IPC2</b>      | 18  | 0.9338  | 0.05188 | 4.36 | 0      | 30   | 72.8 |
| <b>IPC3</b>      | 16  | 0.3162  | 0.01977 | 1.66 | 0.0565 | 10.2 | 83   |
| <b>IPC4</b>      | 14  | 0.2314  | 0.01653 | 1.39 | 0.16   | 7.4  | 90.4 |
| <b>IPC5</b>      | 12  | 0.1507  | 0.01256 | 1.06 | 0.396  | 4.8  | 95.2 |
| <b>IPC6</b>      | 10  | 0.0955  | 0.00955 | 0.8  | 0.629  | 3.1  | 98.3 |
| <b>IPC7</b>      | 8   | 0.0532  | 0.00665 | 0.56 | 0.81   | 1.7  | 100  |
|                  |     |         |         |      |        |      |      |
| <b>Residuals</b> | 210 | 2.4963  | 0.01189 | NA   | NA     | NA   | NA   |
| <b>Total</b>     | 457 | 32.0129 | 0.07005 | NA   | NA     | NA   | NA   |
